# Supplementary material for: m-Benziporphodimethene: a new porphyrin analogue fluorescence zinc(ii) sensor
Source: Royal Society of Chemistry journal article supplement (doi:10.1039/b714412a), 2007-12-21
Supplement: b714412a.pdf [file b714412a.pdf]

Supporting Information for

*m*-Benziporphodimethene—a New Porphyrin Analogue Fluorescence  
Zinc(II) Sensor

**Chen-Hsiung Hung<sup>a\*</sup>, Gao-Fong Chang<sup>a</sup>, Anil Kumar<sup>a</sup>, Geng-Fong Lin<sup>b</sup>, Li-Yang Luo<sup>a,c</sup>,  
Wei-Min Ching<sup>a</sup>, and Eric Wei-Guang Diau<sup>c</sup>**

<sup>a</sup> Institute of Chemistry, Academia Sinica, Nankang, Taipei 105 Taiwan. Fax: 886-2-27831237. E-mail:  
[chhung@chem.sinica.edu.tw](mailto:chhung@chem.sinica.edu.tw)

<sup>b</sup> Department of Chemistry, Tamkang University, Tamsui, Taipei 251 Taiwan

<sup>c</sup> The Department of Applied Chemistry, National Chiao Tung University, Hsinchu, 300 Taiwan

**Synthesis of 1:** A solution of  $\alpha$ ,  $\alpha'$ -dihydroxy-1, 3-diisopropylbenzene (98 mg, 0.50 mmol), benzaldehyde (102  $\mu$ L, 1.01 mmol) and pyrrole (104  $\mu$ L, 1.51 mmol) in  $\text{CH}_2\text{Cl}_2$  (150 mL) was treated with  $\text{BF}_3 \cdot \text{OEt}_2$  (13  $\mu$ L, 0.10 mmol) and stirred at 27  $^\circ\text{C}$ . Two hours later, DDQ (374 mg, 1.65 mmol) was added into the reaction mixture, and stirring was continued for two hours under 27  $^\circ\text{C}$ . The reaction was quenched with triethylamine (10 drops) and then the solvent was removed in vacuum. The crude mixture was dissolved in minimum amount of  $\text{CH}_2\text{Cl}_2$  and was purified by chromatography [ $\text{SiO}_2$  (400 mL), eluted by  $\text{CH}_2\text{Cl}_2$ ] to give **1** (72 mg, 0.136 mmole) [ $R_f$  = 0.11,  $\text{CH}_2\text{Cl}_2$ ] in 27 % yield as a red powder.

$^1\text{H}$  NMR (400MHz,  $\text{CDCl}_3$ , 298K):  $\delta$  = 1.75 (s, 12H; *meso*- $\text{CH}_3$ ), 6.19 (s, 2H; 13,14-H), 6.83 (*ab* quartet,  $^3J(\text{H,H}) = 4.54$ , 4H; 8,9,18,19-H), 7.29-7.48 (m, 13H; 2,3,4-H and *meso*-phenyl), 8.00 (s, 1H; 22-H), 12.46 (s, 1H; NH);  $^{13}\text{C}$  NMR (400 MHz,  $\text{CDCl}_3$ , 298K):  $\delta$  = 29.17, 42.33, 121.50, 123.32, 125.12, 127.45, 127.78, 128.54, 129.06, 131.94, 136.83, 138.27, 138.46, 139.05, 147.38, 152.15, 182.20; UV-Vis ( $\text{CH}_3\text{CN}$ ) [ $\lambda_{\text{max}}/\text{nm}$  (log  $\epsilon$ ): 349 (4.56), 514 (4.28), 542 (4.31); Anal. Found (calc for  $\text{C}_{38}\text{H}_{33}\text{N}_3 \cdot 0.5\text{C}_6\text{H}_{14}$ ): C 84.08 (85.67); H 7.32 (7.01); N 7.31 (7.31); HR-FAB-MS (m/z): calcd.  $[\text{MH}]^+ = 532.2752$  obs.  $[\text{MH}]^+ = 532.2745$

**Synthesis of Zn•1:** Anhydrous zinc chloride (51.3 mg, 0.376 mmol) was dissolved in  $\text{CH}_3\text{CN}$ , added into a solution of **1** (10 mg, 0.0188 mmol) in 30 mL  $\text{CH}_2\text{Cl}_2/\text{CH}_3\text{CN}$  (1:2), and added 1 drop of 2,6-lutidine into the solution. After two minutes of stirring, the solvent was removed under reduced pressure. Dried residue was dissolved in  $\text{CH}_2\text{Cl}_2$  and excess zinc salt was extracted using distilled water. The organic layer was collected and solvent was removed in *vacuo*, and the dried product was dissolved in hexane. Slow evaporation of hexane yielded crystalline form of **Zn•1** (9.1 mg, 77 %).  $^1\text{H}$  NMR (400 MHz, Acetone- $d_6$ , 298 K):  $\delta$  = 1.97 (s, 6H; *meso*- $\text{CH}_3$ ), 2.14 (s, 6H; *meso*- $\text{CH}_3$ ), 6.05 (s, 2H; 13,14-H), 6.76 (d,  $^3J(\text{H,H}) = 4.70$ , 2H; 9,18-H), 6.98 (d,  $^3J(\text{H,H}) = 4.70$ , 2H; 8,19-H), 7.31-7.53(m, 13H; 2, 3, 4-H, *meso*-phenyl), 8.69(s,1H; 22-H); UV-Vis ( $\text{CH}_3\text{CN}$ ) [ $\lambda_{\text{max}}/\text{nm}$  (log  $\epsilon$ ): 350 (4.58), 593 (4.29), 639 (4.56); Anal. Found (calc for  $\text{C}_{38}\text{H}_{32}\text{N}_3\text{ZnCl}$ ): C 71.38 (72.48); H 5.57 (5.13); N 5.85 (6.68); HR-FAB-MS (m/z): calcd.  $[\text{M-Cl}]^+ = 594.1888$ ; obs. 594.1880.

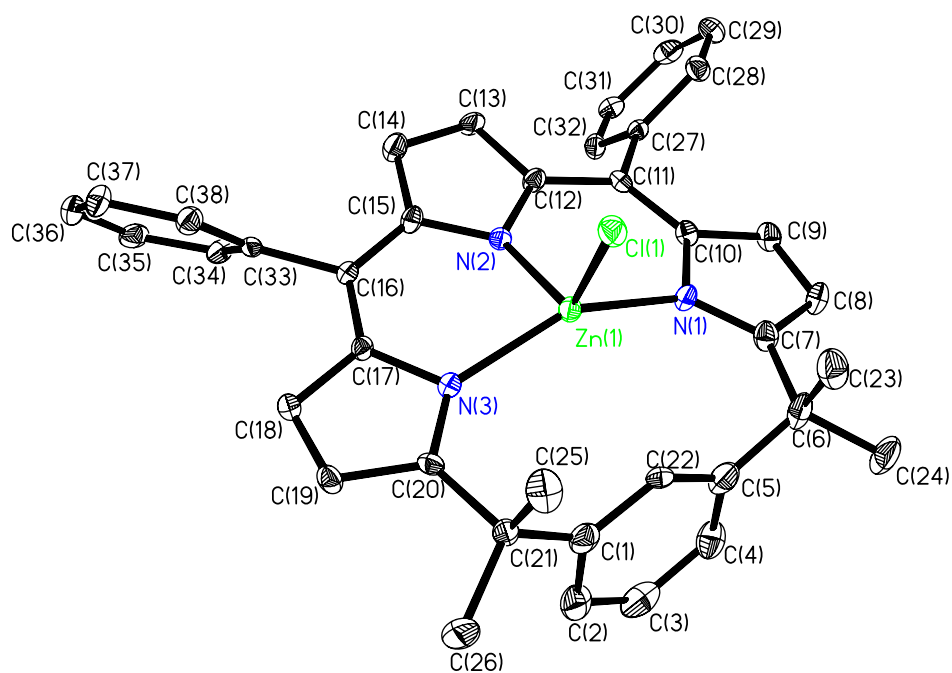

**Supporting Figure 1.** The ORTEP diagram of **1** in 30% probabilities of ellipsoids.

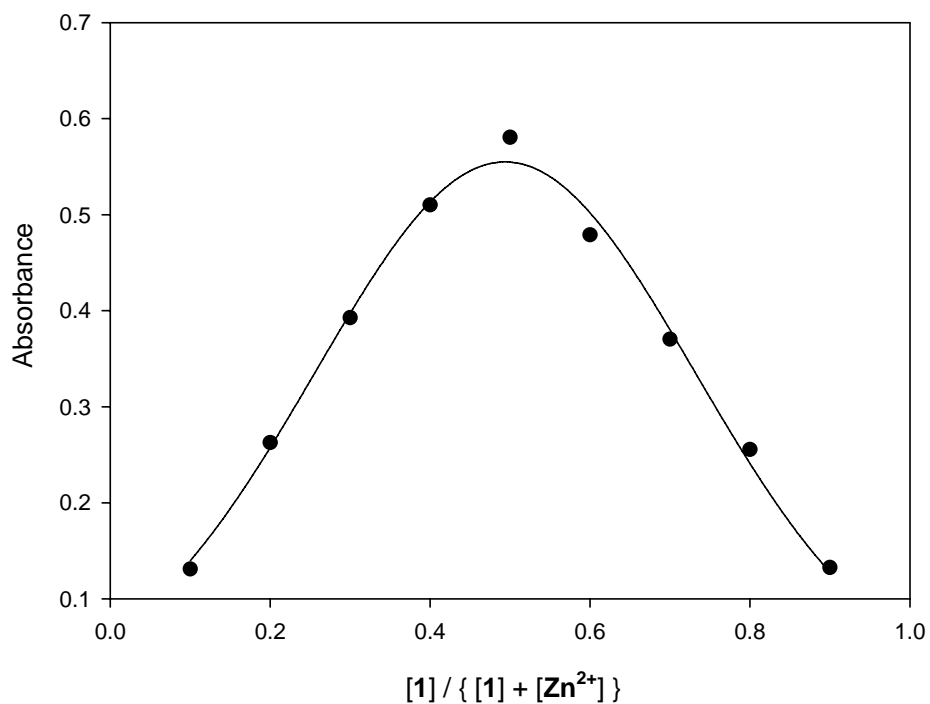

**Supporting Figure 2.** Job plot for the reaction of **1** with  $Zn^{2+}$  ion. Equimolar solutions ( $3.75 \times 10^{-5}$  M) of **1** and  $Zn^{2+}$  (from  $ZnCl_2$ ) in  $CH_3CN$  were prepared. To obtain the plot, **1** and  $Zn^{2+}$  solutions were mixed in various volume ratios (1:9, 2:8, 3:7, 4:6, 5:5, 6:4, 7:3, 8:2, and 9:1). Neat 2,6-lutidine was added to each volume ratio to give a 0.014 M final concentration of 2,6-lutidine.

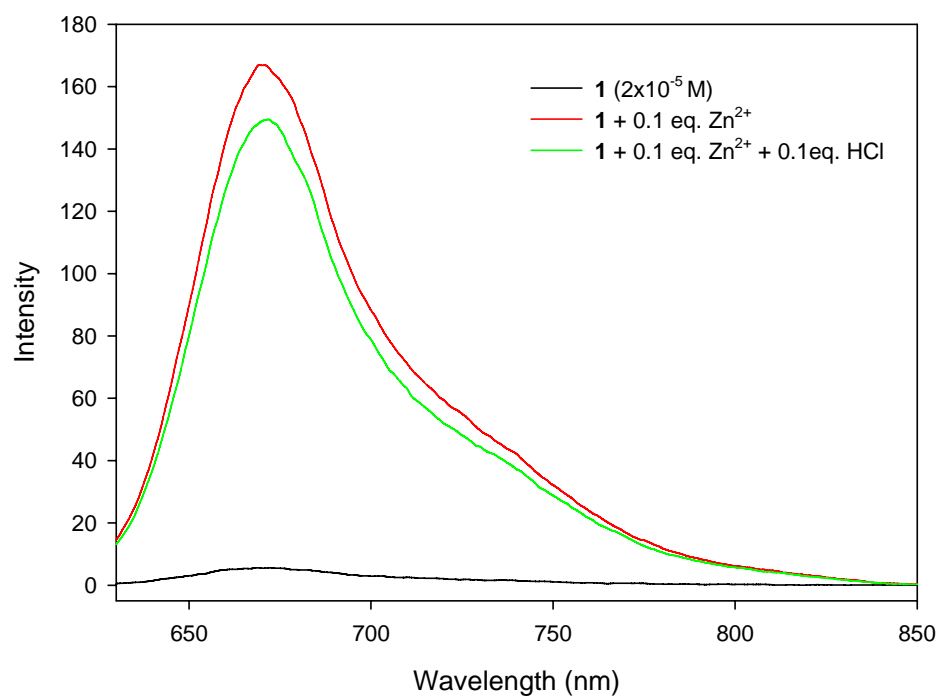

**Supporting Figure 3.** The fluorescence intensity changes when **1** ( $2 \times 10^{-5}$  M) was treated with 0.1 equiv. of  $\text{Zn}^{2+}$  and then 0.1 equiv. of HCl.

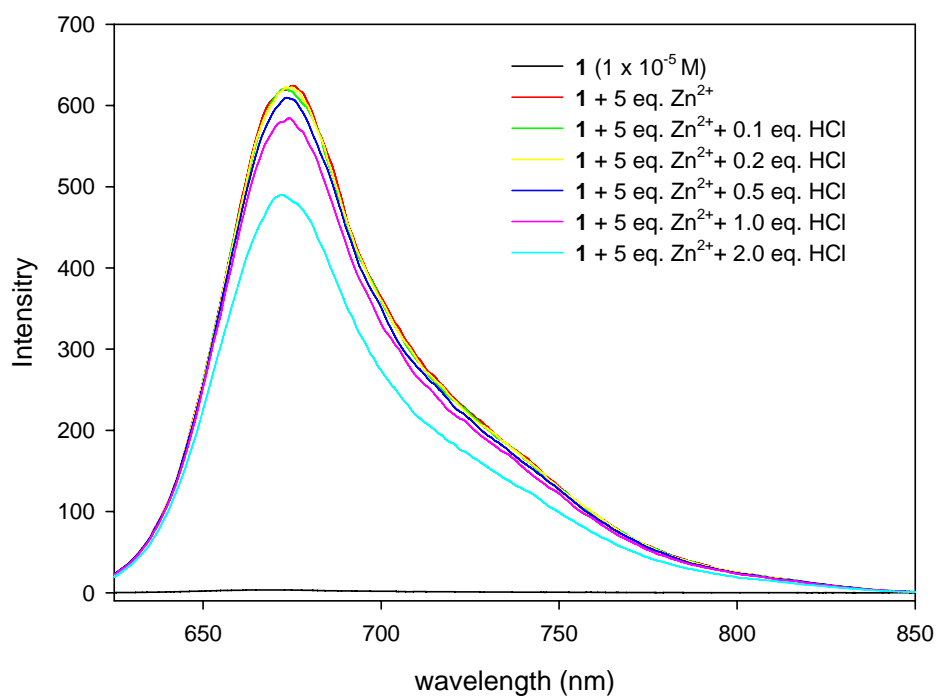

**Supporting Figure 4.** The fluorescence intensity changes when **1** (1 x 10<sup>-5</sup> M) was treated with 5 equiv. of Zn<sup>2+</sup> and increasing amount of HCl.
